# Supplementary material for: Immunologic profiles of multiple sclerosis treatments reveal shared early B cell alterations
Source: PubMed Central journal article supplement — Neurol Neuroimmunol Neuroinflamm. 2016 May 10;3(4):e240. doi: 10.1212/NXI.0000000000000240 (PMC4872020; doi:10.1212/nxi.0000000000000240), 2016-05-10

## Supplementary Data

table e-1. Description of immunological variables investigated.

| Cell type      | Gating strategy used for FlowJo                                                                                                               | Expressed as                        |
|----------------|-----------------------------------------------------------------------------------------------------------------------------------------------|-------------------------------------|
| Lymph          | Tot. lymphocytes                                                                                                                              | % Ungated                           |
| T              | CD3 <sup>+</sup>                                                                                                                              | % Tot. lymphocytes                  |
| CD4            | CD4 <sup>+</sup> CD8 <sup>-</sup>                                                                                                             | % Tot. lymphocytes                  |
| CD4.RTE        | CD4 <sup>+</sup> CD8 <sup>-</sup> CD45RA <sup>+</sup> CCR7 <sup>+</sup> CD31 <sup>+</sup>                                                     | % CD4 <sup>+</sup> CD8 <sup>-</sup> |
| CD4.Naive      | CD4 <sup>+</sup> CD8 <sup>-</sup> CD45RA <sup>+</sup> CCR7 <sup>+</sup>                                                                       | % CD4 <sup>+</sup> CD8 <sup>-</sup> |
| CD4.TEM        | CD4 <sup>+</sup> CD8 <sup>-</sup> CD45RA <sup>-</sup> CCR7 <sup>-</sup>                                                                       | % CD4 <sup>+</sup> CD8 <sup>-</sup> |
| CD4.TEMRA      | CD4 <sup>+</sup> CD8 <sup>-</sup> CD45RA <sup>+</sup> CCR7 <sup>-</sup>                                                                       | % CD4 <sup>+</sup> CD8 <sup>-</sup> |
| CD4.TCM        | CD4 <sup>+</sup> CD8 <sup>-</sup> CD45RA <sup>-</sup> CCR7 <sup>+</sup>                                                                       | % CD4 <sup>+</sup> CD8 <sup>-</sup> |
| Treg           | CD4 <sup>+</sup> CD8 <sup>-</sup> CD25 <sup>+</sup> Foxp3 <sup>+</sup>                                                                        | % CD4 <sup>+</sup> CD8 <sup>-</sup> |
| Th1            | CD4 <sup>+</sup> CD8 <sup>-</sup> IFN $\gamma$ <sup>+</sup>                                                                                   | % CD4 <sup>+</sup> CD8 <sup>-</sup> |
| Th2            | CD4 <sup>+</sup> CD8 <sup>-</sup> IL4 <sup>+</sup>                                                                                            | % CD4 <sup>+</sup> CD8 <sup>-</sup> |
| Th1/Th2        | -                                                                                                                                             | Log(Ratio)                          |
| Th17           | CD4 <sup>+</sup> CD8 <sup>-</sup> IL17 <sup>+</sup>                                                                                           | % CD4 <sup>+</sup> CD8 <sup>-</sup> |
| Tfh            | CD4 <sup>+</sup> CD8 <sup>-</sup> CXCR5 <sup>+</sup>                                                                                          | % CD4 <sup>+</sup> CD8 <sup>-</sup> |
| Tfh.CD45RA-    | CD4 <sup>+</sup> CD8 <sup>-</sup> CXCR5 <sup>+</sup> CD45RA <sup>-</sup>                                                                      | % CD4 <sup>+</sup> CD8 <sup>-</sup> |
| CD4.IL2        | CD4 <sup>+</sup> CD8 <sup>-</sup> IL2 <sup>+</sup>                                                                                            | % CD4 <sup>+</sup> CD8 <sup>-</sup> |
| CD8            | CD4 <sup>-</sup> CD8 <sup>+</sup>                                                                                                             | % Tot. lymphocytes                  |
| CD8.RTE        | CD4 <sup>-</sup> CD8 <sup>+</sup> CD45RA <sup>+</sup> CCR7 <sup>+</sup> CD31 <sup>+</sup>                                                     | % CD4 <sup>-</sup> CD8 <sup>+</sup> |
| CD8.Naive      | CD4 <sup>-</sup> CD8 <sup>+</sup> CD45RA <sup>+</sup> CCR7 <sup>+</sup>                                                                       | % CD4 <sup>-</sup> CD8 <sup>+</sup> |
| CD8.TEM        | CD4 <sup>-</sup> CD8 <sup>+</sup> CD45RA <sup>-</sup> CCR7 <sup>-</sup>                                                                       | % CD4 <sup>-</sup> CD8 <sup>+</sup> |
| CD8.TEMRA      | CD4 <sup>-</sup> CD8 <sup>+</sup> CD45RA <sup>+</sup> CCR7 <sup>-</sup>                                                                       | % CD4 <sup>-</sup> CD8 <sup>+</sup> |
| CD8.TCM        | CD4 <sup>-</sup> CD8 <sup>+</sup> CD45RA <sup>-</sup> CCR7 <sup>+</sup>                                                                       | % CD4 <sup>-</sup> CD8 <sup>+</sup> |
| CD8.IFNG       | CD4 <sup>-</sup> CD8 <sup>+</sup> IFN $\gamma$ <sup>+</sup>                                                                                   | % CD4 <sup>-</sup> CD8 <sup>+</sup> |
| CD8.IL2        | CD4 <sup>-</sup> CD8 <sup>+</sup> IL2 <sup>+</sup>                                                                                            | % CD4 <sup>-</sup> CD8 <sup>+</sup> |
| CD4/CD8        | -                                                                                                                                             | Log(Ratio)                          |
| B              | CD4 <sup>-</sup> CD19 <sup>+</sup>                                                                                                            | % Tot. lymphocytes                  |
| B.Transitional | CD19 <sup>+</sup> CD24 <sup>hi</sup> CD38 <sup>hi</sup>                                                                                       | % B cells                           |
| B.Naive        | CD4 <sup>-</sup> CD19 <sup>+</sup> IgM <sup>+</sup> CD27 <sup>-</sup>                                                                         | % B cells                           |
| B.Switched     | CD4 <sup>-</sup> CD19 <sup>+</sup> IgM <sup>-</sup> CD27 <sup>+</sup>                                                                         | % B cells                           |
| Plasmablast    | CD19 <sup>+</sup> CD24 <sup>-</sup> CD38 <sup>hi</sup>                                                                                        | % B cells                           |
| B.Memory       | CD4 <sup>-</sup> CD19 <sup>+</sup> IgM <sup>+</sup> CD27 <sup>+</sup>                                                                         | % B cells                           |
| T/B            | -                                                                                                                                             | Log(Ratio)                          |
| T.gd           | CD4 <sup>-</sup> CD8 <sup>-</sup> $\gamma\delta$ TCR <sup>+</sup>                                                                             | % Tot. lymphocytes                  |
| NK             | CD3 <sup>-</sup> CD14 <sup>-</sup> CD19 <sup>-</sup> CD11c <sup>-</sup> CD56 <sup>+</sup>                                                     | % FSC,SSC                           |
| NKT            | CD3 <sup>+</sup> CD56 <sup>+</sup>                                                                                                            | % CD3 <sup>+</sup>                  |
| mDC            | CD3 <sup>-</sup> CD14 <sup>-</sup> CD19 <sup>-</sup> CD56 <sup>-</sup> CD11c <sup>+</sup> HLA <sup>-</sup> DR <sup>+</sup>                    | % DCs                               |
| pDC            | CD3 <sup>-</sup> CD14 <sup>-</sup> CD19 <sup>-</sup> CD56 <sup>-</sup> CD11c <sup>-</sup> CD123 <sup>+</sup> HLA <sup>-</sup> DR <sup>+</sup> | % DCs                               |
| mDC/pDC        | -                                                                                                                                             | Log(Ratio)                          |

Heparinized blood was collected and rested at 22°C for four hours prior to isolation of peripheral blood mononuclear cells (PBMC) and serum using lymphocyte separation medium (LSM, MP Biomedicals). PBMCs were frozen in 10% dimethyl sulfoxide (Sigma) and stored at -80°C prior to analysis. Thawed cells were stained with eBioscience antibodies against CD11c (3.9), CD3 (SK7), CD4 (RPA-T4), CD8a (RPA-T8), CD19 (HIB19), CD45Ra (HI100), CD56 (MEM188), HLA-DR (LN3), FOXP3 (206D, Biolegend), IFN- $\gamma$  (4S.B3 IL-17 (eBio64DEC17), IL-2 (MQ1-17H12), CXCR5 (IgG23, R&D), CD31 (WM-59), CCR7 (3D12), IgM (MHM-88, Biolegend), CD27 (O323), IgE (IgE21), CD24 (eBioSN3, SN3 A5-2H10), CD38 (HIT2),  $\gamma\delta$ TCR (B1.1), V $\alpha$ 24J $\alpha$ 18 (6B11), CD56 (MEM188), CD14 (61D3), CD123 (6H6) and IL-4 (8D4-8). Cytokine staining was performed using T cells stimulated *ex vivo* for five hours in 50 ng/ml phorbol 12-myristate 13-acetate (Sigma) and 500 ng/ml ionomycin (Sigma) in the presence of GolgiStop (BD Biosciences). Stimulated cells were surface stained, then fixed and permeabilized using Cytofix/cytoperm (BD), prior to staining for cytokines. Ki67 and Foxp3 staining was performed on thawed cells following treatment with fixation/permeabilization buffer (eBioscience). Cells were analysed in five flow cytometric panels using the following combinations of stains: CD4, CD8, CD45Ra, CD25, CXCR5 and Foxp3; CD4, CD8, CD45Ra, CCR7, CD31 and  $\gamma\delta$ TCR; CD3, CD56, CD14/CD19, CD11c, HLA-DR and CD123; CD4, CD19, IgM, CD27, CD24 and CD38; CD4, CD8, IL2, IFN $\gamma$ , IL4 and IL17. Data was acquired on a BD FACSCantoII and analyzed with FlowJo (Tree star).

**table e-2. Associations with gender, age, disease duration and disease.**

Linear regression of autoimmune disease (AITD N=55, untreated MS N=52, untreated MS and AITD: N=4) versus controls (N=36) with covariates age, gender and disease duration: <sup>a</sup>Regression coefficient, <sup>b</sup>*p* value. **A.** Measurements expressed as proportions of (grand-)parental cells as described in Supplementary table 1. **B.** Follow-up for significant findings as proportion of total lymphocytes.

| Cell Type                                | Gender |               | Age    |                 | AITD   |               | MS     |              | Disease Duration AITD |              | Disease Duration MS |          |
|------------------------------------------|--------|---------------|--------|-----------------|--------|---------------|--------|--------------|-----------------------|--------------|---------------------|----------|
|                                          | Beta   | <i>p</i>      | Beta   | <i>p</i>        | Beta   | <i>p</i>      | Beta   | <i>p</i>     | Beta                  | <i>p</i>     | Beta                | <i>p</i> |
| <b>A. As % of (grand-)parental cells</b> |        |               |        |                 |        |               |        |              |                       |              |                     |          |
| Lymph                                    | 0.240  | 0.918         | -0.042 | 0.608           | -0.263 | 0.925         | -1.075 | 0.741        | -0.037                | 0.923        | -0.121              | 0.557    |
| T                                        | 1.778  | 0.416         | -0.191 | <u>0.026</u>    | -2.033 | 0.462         | -3.727 | 0.232        | 0.309                 | 0.435        | 0.136               | 0.451    |
| CD4/CD8                                  | 0.494  | <u>0.0011</u> | -0.006 | 0.260           | -0.156 | 0.383         | 0.091  | 0.658        | 0.024                 | 0.328        | 0.012               | 0.364    |
| CD4                                      | 5.400  | <u>0.0069</u> | -0.060 | 0.387           | 0.581  | 0.807         | 0.570  | 0.835        | 0.615                 | 0.061        | 0.176               | 0.309    |
| CD4.RTE                                  | 8.615  | <u>0.0010</u> | -0.251 | <u>0.0055</u>   | 6.105  | <u>0.047</u>  | -2.027 | 0.573        | -0.117                | 0.779        | 0.030               | 0.895    |
| CD4.Naive                                | 5.784  | 0.137         | -0.184 | 0.171           | 8.346  | 0.073         | -1.123 | 0.837        | 0.284                 | 0.653        | -0.119              | 0.728    |
| CD4.TEM                                  | -5.899 | 0.137         | 0.022  | 0.874           | -7.482 | 0.115         | 0.307  | 0.956        | -0.322                | 0.618        | 0.101               | 0.771    |
| CD4.TEMRA                                | -0.615 | 0.811         | 0.069  | 0.436           | -0.853 | 0.781         | -0.692 | 0.849        | -0.391                | 0.353        | -0.047              | 0.838    |
| CD4.TCM                                  | 0.728  | 0.559         | 0.093  | <u>0.033</u>    | -0.012 | 0.994         | 1.507  | 0.392        | 0.429                 | <u>0.037</u> | 0.064               | 0.560    |
| CD4.IL2                                  | 0.795  | 0.202         | 0.069  | <u>0.0046</u>   | -0.865 | 0.262         | 0.458  | 0.606        | 0.012                 | 0.900        | -0.066              | 0.199    |
| Treg                                     | -1.861 | <u>0.0028</u> | 0.046  | 0.052           | 0.087  | 0.908         | 1.294  | 0.139        | -0.013                | 0.889        | -0.037              | 0.465    |
| Th1                                      | -1.532 | 0.173         | 0.001  | 0.980           | -0.605 | 0.663         | -0.125 | 0.937        | -0.162                | 0.350        | -0.078              | 0.390    |
| Th2                                      | -3.441 | 0.113         | 0.015  | 0.857           | 1.285  | 0.631         | 1.259  | 0.684        | -0.397                | 0.228        | -0.075              | 0.670    |
| Th1/Th2                                  | 0.194  | 0.429         | -0.001 | 0.934           | -0.121 | 0.689         | -0.128 | 0.711        | 0.013                 | 0.720        | -0.006              | 0.753    |
| Th17                                     | -0.039 | 0.479         | 0.001  | 0.572           | 0.137  | <u>0.046</u>  | -0.002 | 0.981        | 0.013                 | 0.143        | 0.002               | 0.727    |
| Tfh                                      | 0.025  | 0.967         | 0.014  | 0.633           | 0.711  | 0.334         | -0.360 | 0.664        | -0.010                | 0.935        | -0.007              | 0.872    |
| Tfh.CD45RA <sup>-</sup>                  | 0.026  | 0.964         | 0.012  | 0.671           | 0.513  | 0.456         | -0.430 | 0.580        | -0.008                | 0.947        | -0.005              | 0.915    |
| CD8                                      | -4.881 | <u>0.036</u>  | 0.061  | 0.453           | 4.546  | 0.105         | -0.040 | 0.990        | -0.074                | 0.846        | -0.060              | 0.766    |
| CD8.RTE                                  | 4.841  | 0.104         | -0.442 | <u>3.84E-05</u> | 2.025  | 0.567         | -6.807 | 0.106        | 0.190                 | 0.695        | 0.137               | 0.601    |
| CD8.Naive                                | 3.794  | 0.264         | -0.399 | <u>0.0010</u>   | 1.200  | 0.767         | -6.372 | 0.184        | 0.136                 | 0.806        | 0.033               | 0.912    |
| CD8.TEM                                  | 1.168  | 0.731         | 0.037  | 0.757           | 2.209  | 0.587         | 12.316 | <u>0.012</u> | 0.625                 | 0.263        | -0.123              | 0.684    |
| CD8.TEMRA                                | -5.627 | 0.175         | 0.349  | <u>0.016</u>    | -3.472 | 0.483         | -6.708 | 0.252        | -0.834                | 0.219        | 0.118               | 0.747    |
| CD8.TCM                                  | 0.665  | 0.125         | 0.014  | 0.364           | 0.057  | 0.912         | 0.769  | 0.207        | 0.074                 | 0.293        | -0.029              | 0.450    |
| CD8.IFNG                                 | -6.342 | 0.069         | 0.344  | <u>0.012</u>    | -2.078 | 0.629         | 5.436  | 0.268        | -0.410                | 0.443        | -0.467              | 0.099    |
| CD8.IL2                                  | -1.744 | 0.194         | 0.126  | <u>0.015</u>    | 1.628  | 0.327         | 3.420  | 0.076        | 0.131                 | 0.528        | -0.029              | 0.795    |
| B                                        | 1.308  | 0.440         | 0.111  | 0.088           | 0.680  | 0.747         | 6.043  | <u>0.013</u> | -0.337                | 0.201        | -0.247              | 0.079    |
| B.Transitional                           | -0.530 | 0.819         | 0.214  | 0.066           | 5.789  | <u>0.046</u>  | -3.779 | 0.257        | -1.078                | 0.089        | -0.028              | 0.873    |
| B.Naive                                  | -2.508 | 0.227         | 0.045  | 0.569           | 4.636  | 0.073         | -2.357 | 0.427        | -0.270                | 0.396        | 0.049               | 0.773    |
| B.Switched                               | 1.167  | 0.281         | -0.098 | <u>0.019</u>    | -4.244 | <u>0.0019</u> | -0.784 | 0.612        | 0.382                 | <u>0.023</u> | 0.161               | 0.073    |
| Plasmablast                              | -0.112 | 0.626         | -0.009 | 0.439           | 0.007  | 0.980         | -0.574 | 0.086        | -0.089                | 0.151        | 0.009               | 0.581    |
| B.Memory                                 | 0.057  | 0.951         | -0.030 | 0.408           | -1.224 | 0.294         | 2.498  | 0.065        | 0.040                 | 0.782        | -0.089              | 0.251    |
| T/B                                      | -0.037 | 0.730         | -0.008 | 0.065           | -0.066 | 0.633         | -0.326 | <u>0.036</u> | 0.021                 | 0.278        | 0.012               | 0.167    |
| gdT                                      | 0.059  | 0.871         | -0.012 | 0.336           | -0.563 | 0.207         | -0.674 | 0.190        | -0.046                | 0.446        | -0.006              | 0.861    |

|         |        |              |        |       |        |       |        |       |        |       |        |       |
|---------|--------|--------------|--------|-------|--------|-------|--------|-------|--------|-------|--------|-------|
| NK      | -1.763 | 0.122        | 0.076  | 0.086 | -0.607 | 0.672 | -2.018 | 0.214 | 0.102  | 0.619 | 0.022  | 0.818 |
| NKT     | -2.695 | 0.137        | 0.097  | 0.168 | -0.423 | 0.853 | 0.640  | 0.804 | -0.407 | 0.215 | -0.096 | 0.520 |
| mDC     | -5.727 | <u>0.014</u> | 0.096  | 0.287 | 1.914  | 0.512 | -2.824 | 0.391 | 0.070  | 0.866 | 0.126  | 0.509 |
| pDC     | -0.268 | 0.712        | -0.018 | 0.534 | -1.157 | 0.202 | -0.649 | 0.533 | 0.039  | 0.760 | -0.024 | 0.683 |
| mDC/pDC | -0.119 | 0.412        | 0.011  | 0.051 | 0.196  | 0.279 | -0.105 | 0.613 | 0.000  | 0.988 | 0.007  | 0.568 |

**B. As % of total lymphocytes**

---

|                |        |              |         |              |        |               |        |               |        |       |        |              |
|----------------|--------|--------------|---------|--------------|--------|---------------|--------|---------------|--------|-------|--------|--------------|
| CD4.RTE        | 2.230  | <u>0.030</u> | -0.060  | 0.090        | 2.998  | <u>0.014</u>  | -0.180 | 0.901         | -0.022 | 0.895 | -0.020 | 0.823        |
| Th17           | -0.001 | 0.921        | 0.00024 | 0.426        | 0.023  | <u>0.021</u>  | -0.003 | 0.817         | 0.002  | 0.206 | 0.000  | 0.742        |
| B.Transitional | -0.384 | 0.554        | 0.066   | <u>0.044</u> | 1.518  | 0.060         | -0.896 | 0.335         | -0.288 | 0.103 | -0.006 | 0.900        |
| B.Switched     | 0.486  | 0.112        | -0.015  | 0.196        | -1.062 | <u>0.0056</u> | 0.486  | 0.267         | 0.077  | 0.102 | 0.016  | 0.520        |
| CD8.TEM        | -0.096 | 0.877        | -0.021  | 0.319        | -0.990 | 0.180         | 0.675  | 0.442         | 0.083  | 0.405 | -0.040 | 0.458        |
| B.Memory       | 0.109  | 0.683        | -0.004  | 0.676        | -0.342 | 0.304         | 1.113  | <u>0.0042</u> | 0.000  | 0.994 | -0.044 | <u>0.050</u> |

**table e-3. Associations with four common immunomodulatory treatments in MS.**

Linear regression of MS patients treated with four immunomodulatory treatments (IFNB: interferon-beta, GA: glatiramer acetate, NAT: natalizumab, FTY720: fingolimod) compared to grouped controls and untreated patients (N=92, except for \*: untreated MS patients only) including age and gender as covariates. Multiple testing correction:  $p < 0.00033$  (underlined), nominal significance:  $p < 0.05$  (italics).

| Cell Type      | IFNB (N=54) |                        | GA (N=21) |              | NAT (N=9) |              | FTY720 (N=14) |                        |
|----------------|-------------|------------------------|-----------|--------------|-----------|--------------|---------------|------------------------|
|                | Beta        | <i>p</i>               | Beta      | <i>p</i>     | Beta      | <i>p</i>     | Beta          | <i>p</i>               |
| Lymph          | -2.08       | 0.42                   | -4.46     | 0.23         | -1.76     | 0.69         | -3.17         | 0.56                   |
| T              | -2.59       | 0.24                   | 3.46      | 0.27         | -6.16     | 0.16         | -6.77         | 0.24                   |
| CD4.RTE        | 6.00        | <i>0.017</i>           | 7.44      | <i>0.045</i> | -0.54     | 0.9          | -14.14        | <i>0.0078</i>          |
| CD4.Naive      | 12.44       | <i>0.0011</i>          | 9.49      | 0.087        | 5.00      | 0.46         | -25.17        | <i>0.0017</i>          |
| CD4.TEM        | -10.98      | <i>0.0055</i>          | -7.73     | 0.18         | -2.24     | 0.75         | 12.97         | 0.12                   |
| CD4.TEMRA      | -2.85       | 0.27                   | 1.61      | 0.67         | -1.65     | 0.72         | 19.87         | <i>0.00039</i>         |
| CD4.TCM        | 1.39        | 0.25                   | -3.37     | 0.062        | -1.13     | 0.61         | -7.68         | <i>0.0031</i>          |
| Treg           | 0.40        | 0.53                   | -1.31     | 0.15         | NA        | NA           | 2.75          | <i>0.0098</i>          |
| Th1            | -3.39       | <i>0.0014</i>          | 0.22      | 0.88         | -0.72     | 0.73         | 4.62          | <i>0.0095</i>          |
| Th2            | -2.20       | 0.3                    | -1.24     | 0.68         | -6.13     | 0.14         | 25.37         | <u><i>3.91E-12</i></u> |
| Th1/Th2        | -0.42       | 0.078                  | 0.22      | 0.51         | 0.43      | 0.36         | -0.77         | 0.052                  |
| Th17           | 0.09        | 0.38                   | 0.37      | <i>0.013</i> | 0.04      | 0.85         | 0.15          | 0.37                   |
| Tfh            | 0.58        | 0.15                   | 0.30      | 0.60         | NA        | NA           | 0.48          | 0.45                   |
| Tfh.CD45Ra-    | 0.60        | 0.13                   | 0.39      | 0.49         | NA        | NA           | 0.55          | 0.39                   |
| CD4.IL2        | -0.53       | 0.35                   | -1.15     | 0.16         | -1.41     | 0.21         | -5.07         | <u><i>1.46E-07</i></u> |
| CD8            | -3.3        | 0.16                   | 4.95      | 0.14         | -6.64     | 0.1          | 14.22         | <i>0.0047</i>          |
| CD8.RTE        | 10.57       | <i>0.00038</i>         | -1.92     | 0.65         | -5.14     | 0.33         | -14.43        | <i>0.019</i>           |
| CD8.Naive      | 9.80        | <i>0.0033</i>          | -2.27     | 0.64         | -6.30     | 0.29         | -15.31        | <i>0.028</i>           |
| CD8.TEM*       | -6.62       | 0.10                   | -5.33     | 0.34         | 6.80      | 0.31         | -16.34        | <i>0.037</i>           |
| CD8.TEMRA      | -6.86       | 0.064                  | 5.94      | 0.28         | -3.31     | 0.62         | 30.30         | <u><i>0.00016</i></u>  |
| CD8.TCM        | 0.48        | 0.24                   | -0.66     | 0.28         | -0.12     | 0.87         | -1.39         | 0.11                   |
| CD8.IFNG       | -10.69      | <u><i>0.00032</i></u>  | 0.070     | 0.99         | -6.18     | 0.29         | 23.89         | <u><i>2.68E-06</i></u> |
| CD8.IL2        | 2.64        | <i>0.037</i>           | -2.61     | 0.15         | 2.91      | 0.24         | -8.63         | <u><i>4.88E-05</i></u> |
| CD4            | 2.63        | 0.20                   | -2.42     | 0.42         | 2.85      | 0.42         | -9.51         | <i>0.032</i>           |
| CD4/CD8        | 0.26        | 0.088                  | -0.38     | 0.086        | 0.51      | 0.055        | -2.00         | <u><i>1.00E-08</i></u> |
| B*             | 5.51        | <i>0.0064</i>          | -2.86     | 0.30         | 4.71      | 0.23         | -22.38        | <u><i>1.16E-10</i></u> |
| B.Transitional | 8.79        | <u><i>0.00030</i></u>  | -0.58     | 0.87         | NA        | NA           | 13.44         | <i>0.0012</i>          |
| B.Naive        | 7.52        | <i>0.00037</i>         | 3.64      | 0.23         | -6.84     | 0.12         | -21.62        | <u><i>6.44E-09</i></u> |
| B.Switched     | -4.2        | <u><i>0.000080</i></u> | -2.12     | 0.16         | 5.05      | <i>0.023</i> | -6.91         | <u><i>0.00014</i></u>  |
| Plasmablast    | 0.11        | 0.71                   | -0.14     | 0.76         | NA        | NA           | 3.64          | <u><i>3.50E-09</i></u> |
| B.Memory       | -1.46       | 0.10                   | -0.39     | 0.76         | 3.13      | 0.092        | -2.20         | 0.14                   |
| T/B*           | -0.22       | 0.075                  | 0.20      | 0.24         | -0.36     | 0.13         | 1.49          | <u><i>1.43E-06</i></u> |
| gdT            | -0.48       | 0.12                   | -0.45     | 0.32         | -0.48     | 0.36         | -0.38         | 0.56                   |
| NK             | -2.28       | <i>0.020</i>           | -0.12     | 0.93         | 2.79      | 0.15         | 9.30          | <i>0.00034</i>         |
| NKT            | -5.9        | <i>0.00048</i>         | 0.25      | 0.91         | -4.22     | 0.2          | 16.87         | <u><i>0.00014</i></u>  |
| mDC            | -9.39       | <u><i>9.22E-06</i></u> | 4.37      | 0.13         | -7.82     | 0.054        | 24.6          | <u><i>4.50E-05</i></u> |
| pDC            | -1.5        | <i>0.038</i>           | 0.10      | 0.92         | 1.10      | 0.42         | -2.75         | 0.23                   |
| mDC/pDC        | -0.25       | 0.093                  | 0.35      | 0.1          | -0.4      | 0.17         | 1.52          | <i>0.0018</i>          |



**figure e-2. Effect of immunomodulatory multiple sclerosis treatments on T cell subsets as a proportion of total lymphocytes.** Effect of four immunomodulatory treatments (IFNB: interferon-beta, GA: glatiramer acetate, NAT: natalizumab, FTY720: fingolimod) is compared with combined controls (CON) and untreated (UNT) multiple sclerosis patients, after establishing no significant difference between the latter two groups. A linear regression with covariates age and gender is applied. Data is displayed for **A.** total T cells, **B.** Th1 cells, **C.** Th2 cells, **D.** Th17 cells, **E.** follicular helper T cells. Median with boxes indicating 25th and 75th percentile and whiskers indicating range.

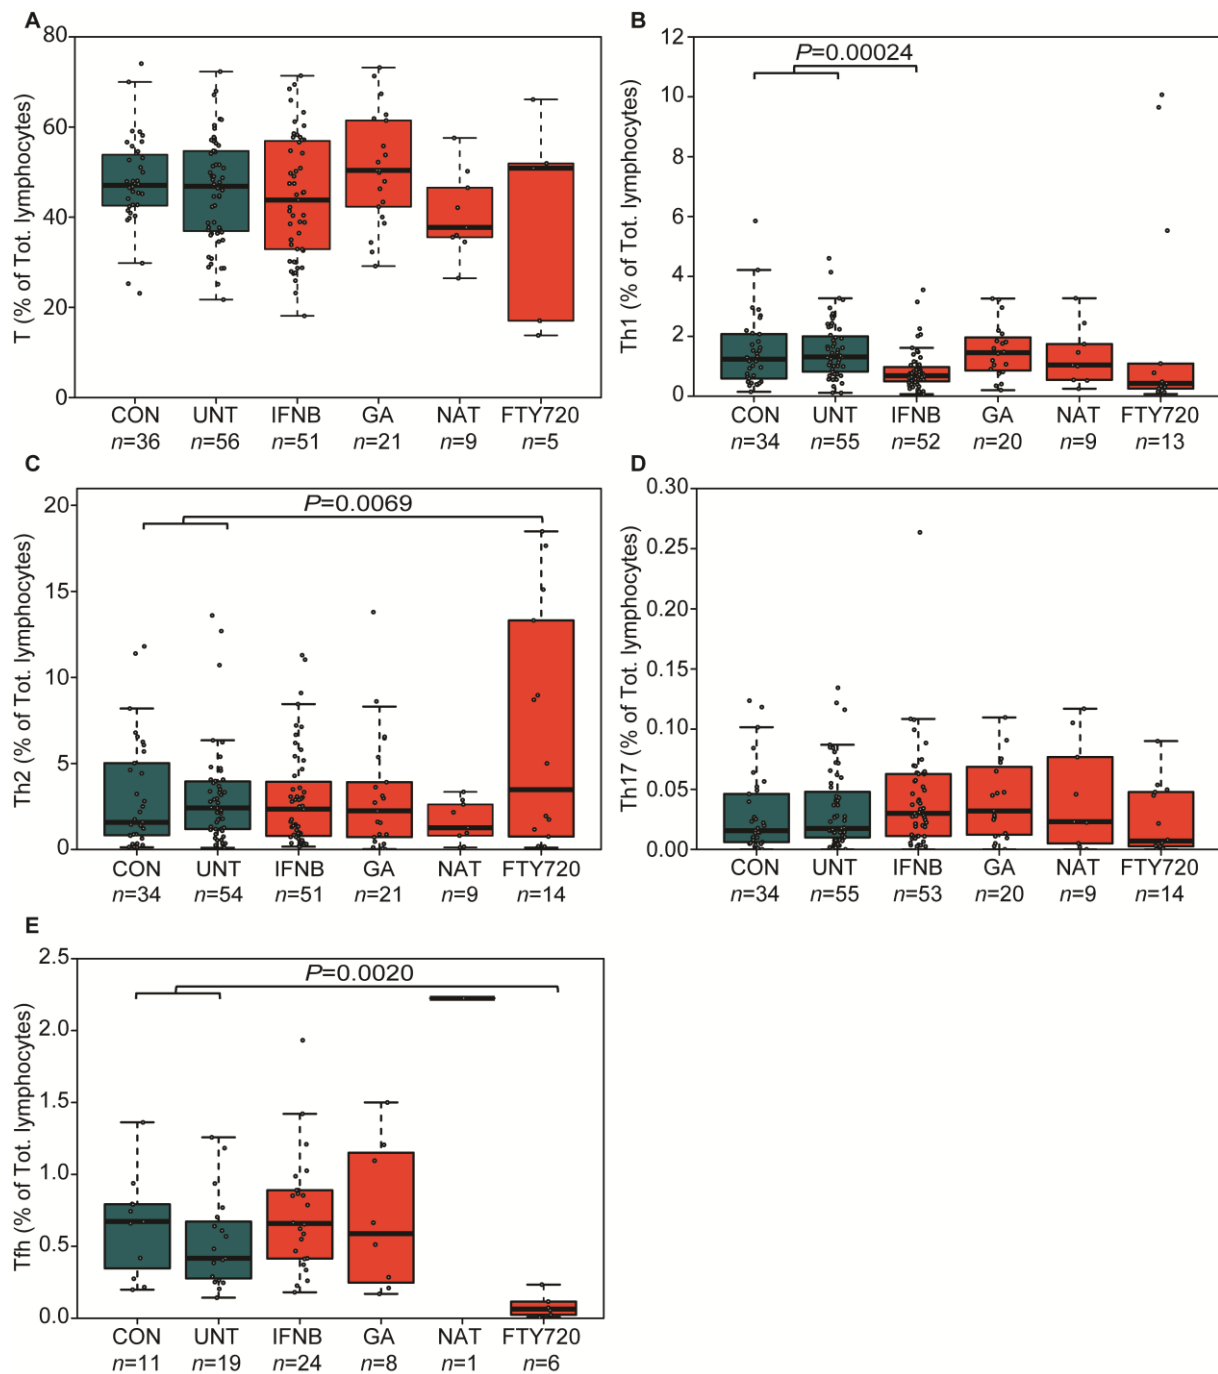

**figure e-3. Effect of immunomodulatory multiple sclerosis treatments on B cell subsets as a proportion of total lymphocytes.** Effect of four immunomodulatory treatments (IFNB: interferon-beta, GA: glatiramer acetate, NAT: natalizumab, FTY720: fingolimod) is compared with combined controls (CON) and untreated (UNT) multiple sclerosis patients, after establishing no significant difference between the latter two groups. A linear regression with covariates age and gender is applied. Data is displayed for **A.** total B cells, **B.** transitional B cells, **C.** naïve B cells, **D.** class-switched B cells, **E.** plasmablasts, and **F.** memory B cells. Median with boxes indicating 25th and 75th percentile and whiskers indicating range.

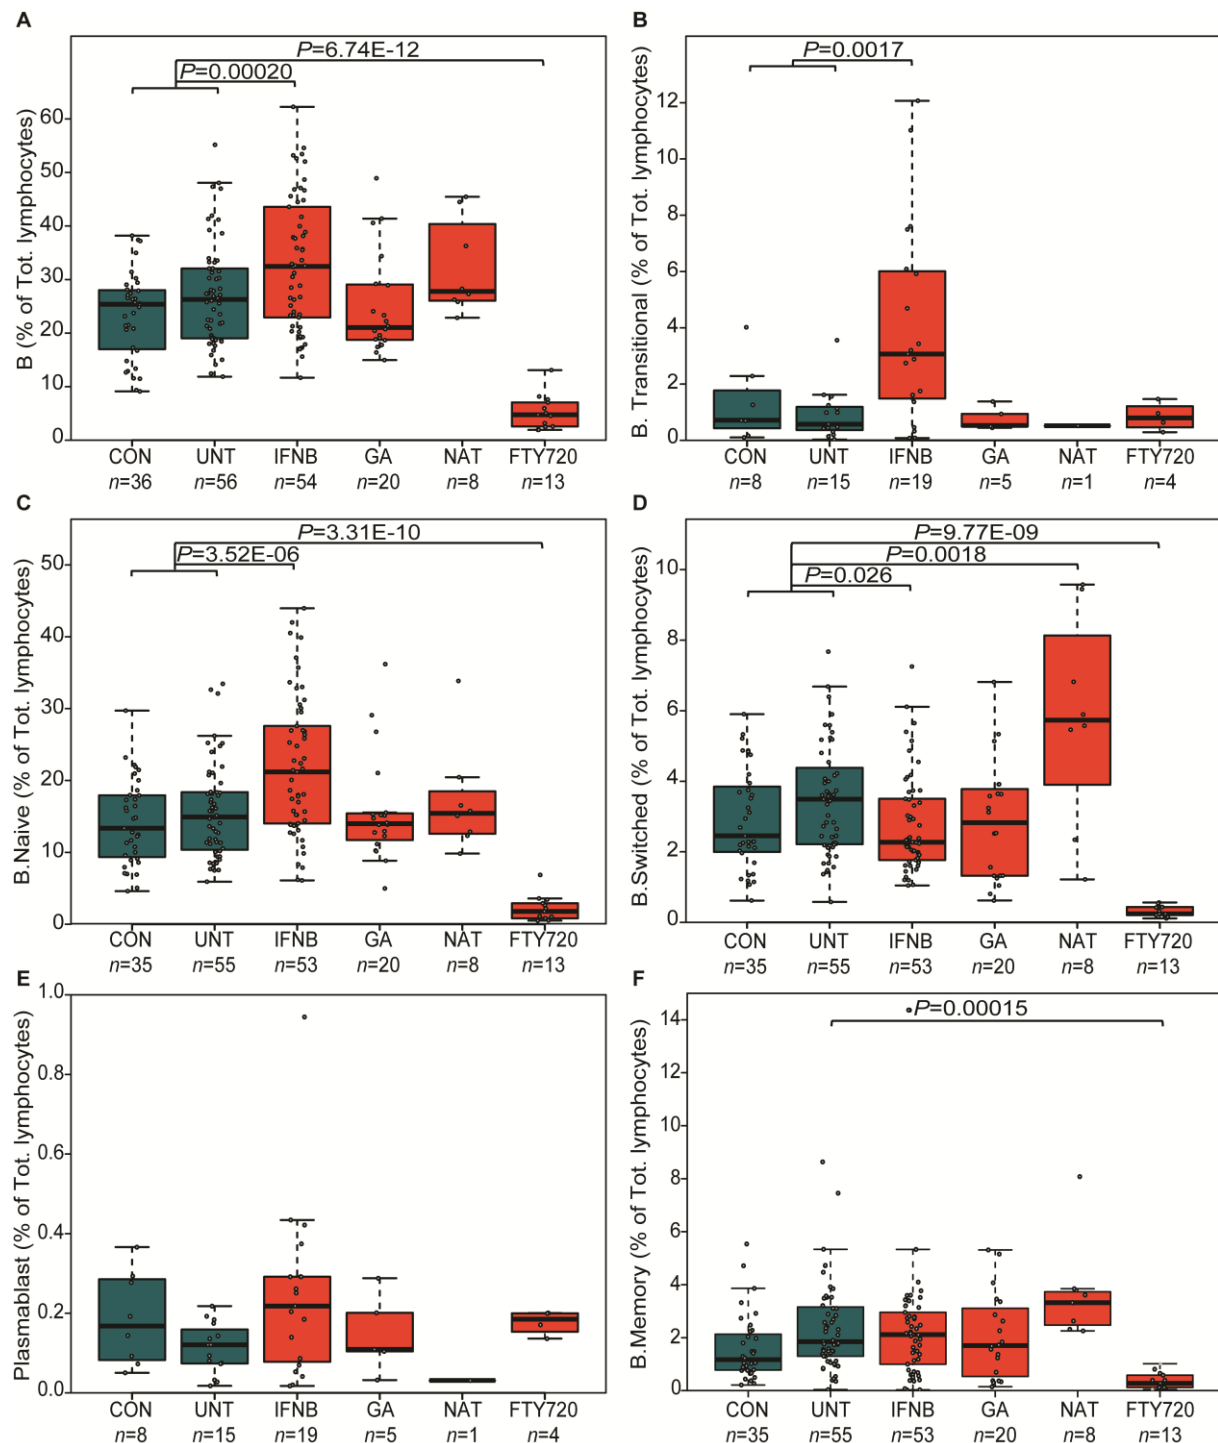

Supplement: supp_3.4.e240_Dooley_SupplData_revised.pdf [file supp_3.4.e240_Dooley_SupplData_revised.pdf]
